# Supplementary material for: Calculation of Permeability Coefficients from Solute Equilibration Dynamics: An Assessment of Various Methods
Source: MDPI journal article supplement (doi:10.3390/membranes12030254), 2022-02-23
Supplement: s1 [file s1]

Supplementary Materials for

# Calculation of Permeability Coefficients from Solute Equilibration Dynamics: An Assessment of Various Methods

Margarida M. Cordeiro <sup>1,2</sup>, Armindo Salvador <sup>1,3,4,\*</sup> and Maria João Moreno <sup>1,2,\*</sup>

<sup>1</sup> Coimbra Chemistry Center-Institute of Molecular Sciences (CQC-IMS), University of Coimbra, 3004-535 Coimbra, Portugal; mmc.margarida0@gmail.com

<sup>2</sup> Department of Chemistry, University of Coimbra, 3004-535 Coimbra, Portugal

<sup>3</sup> CNC—Centre for Neuroscience Cell Biology, University of Coimbra, UC-Biotech, Parque tecnológico de Cantanhede, núcleo 04, lote 8, 3060-197 Cantanhede, Portugal

<sup>4</sup> Institute for Interdisciplinary Research, University of Coimbra, Casa Costa Alemão, 3030-789, Coimbra, Portugal

\* Correspondence: salvador@cnc.uc.pt (A.S.); mmoreno@ci.uc.pt (M.J.M.)

|                                                                     |   |
|---------------------------------------------------------------------|---|
| S1 – Abbreviations                                                  | 2 |
| S2 – Supplementary figures for non-ionisable solutes and weak acids | 7 |
| S3 – Model for the permeation of weak bases                         | 8 |

**S1 – Abbreviations**

|                   |                                                                                                                                                                                                     |
|-------------------|-----------------------------------------------------------------------------------------------------------------------------------------------------------------------------------------------------|
| $A_{\text{io}}$   | Total area of the surfaces separating the two membrane leaflets                                                                                                                                     |
| $a_{\text{L}}$    | Surface area <i>per</i> lipid molecule                                                                                                                                                              |
| $BD_{\text{wo}}$  | Deprotonated form of the buffer in the outer aqueous compartment                                                                                                                                    |
| $BH_{\text{wo}}$  | Protonated form of the buffer in the outer aqueous compartment                                                                                                                                      |
| $B_{\text{T}}$    | Concentration of the pH buffer outside the vesicles ( $nB_{\text{T}}/V_{\text{wo}}$ )                                                                                                               |
| $\beta$           | Characteristic constant                                                                                                                                                                             |
| $c_{\text{L}}$    | Lipid concentration                                                                                                                                                                                 |
| $fSH_{\text{lo}}$ | Fraction of protonated acid (the neutral permeating species) in the outer membrane leaflet ( $SH_{\text{lo}}/(SH_{\text{lo}} + SD_{\text{lo}})$ )                                                   |
| $fSH_{\text{o}}$  | Fraction of protonated acid (the neutral permeating species) in the outer compartment ( $((SH_{\text{lo}} + SH_{\text{wo}})/(SH_{\text{lo}} + SD_{\text{lo}} + SH_{\text{wo}} + SD_{\text{wo}}))$ ) |
| $fSH_{\text{wD}}$ | Fraction of protonated acid (the neutral permeating species) in the donor aqueous compartment ( $SH_{\text{wD}}/(SH_{\text{wD}} + SD_{\text{wD}})$ )                                                |
| $fV_{\text{IA}}$  | Fractional volume of the membrane leaflet of the acceptor compartments ( $V_{\text{IA}}/V_{\text{T}}$ )                                                                                             |
| $fV_{\text{ID}}$  | Fractional volume of the membrane leaflet of the donor compartments ( $V_{\text{ID}}/V_{\text{T}}$ )                                                                                                |
| $fV_{\text{li}}$  | Fractional volume of the inner membrane leaflet ( $V_{\text{li}}/V_{\text{T}}$ )                                                                                                                    |
| $fV_{\text{lo}}$  | Fractional volume of the outer membrane leaflet ( $V_{\text{lo}}/V_{\text{T}}$ )                                                                                                                    |
| $fV_{\text{wA}}$  | Fractional volume of the acceptor aqueous compartments ( $V_{\text{wA}}/V_{\text{T}}$ )                                                                                                             |
| $fV_{\text{wD}}$  | Fractional volume of the donor aqueous compartments ( $V_{\text{wD}}/V_{\text{T}}$ )                                                                                                                |
| $fV_{\text{wi}}$  | Fractional volume of the inner aqueous media ( $V_{\text{wi}}/V_{\text{T}}$ )                                                                                                                       |
| $fV_{\text{wo}}$  | Fractional volume of the outer aqueous medium ( $V_{\text{wo}}/V_{\text{T}}$ )                                                                                                                      |
| $h$               | Membrane thickness                                                                                                                                                                                  |
| $H_{\text{i}}$    | Aggregated variable including free protons and species carrying a labile proton in the inner compartments ( $(nH_{\text{wi}} + nSH_{\text{wi}} + nSH_{\text{li}} + nPH_{\text{wi}})/V_{\text{i}}$ ) |

|                             |                                                                                                                                                                            |
|-----------------------------|----------------------------------------------------------------------------------------------------------------------------------------------------------------------------|
| $H_o$                       | Aggregated variable including free protons and species carrying a labile proton in the outer compartments $(nH_{wo} + nSH_{wo} + nSH_{lo} + nBH_{wo}) / (V_{wo} + V_{lo})$ |
| $H_T$                       | Total concentration of protons $((nH_o + nH_i) / V_T)$                                                                                                                     |
| $H_{wi}$                    | Free protons in the inner aqueous compartment                                                                                                                              |
| $H_{wo}$                    | Free protons in the outer aqueous compartment                                                                                                                              |
| $K_a^B$                     | Acidity constant of the buffer                                                                                                                                             |
| $K_a^P$                     | Acidity constant of the fluorescent probe                                                                                                                                  |
| $K_a^{Sl}$                  | Acidity constant of the weak acid in the membrane                                                                                                                          |
| $K_a^{Sw}$                  | Acidity constant of the weak acid in the aqueous media                                                                                                                     |
| $k_{lio}^S$                 | Translocation rate constant of the non-ionisable solute towards the outer leaflet                                                                                          |
| $k_{lio}^{SH}$              | Translocation rate constant of the weak acid towards the outer leaflet                                                                                                     |
| $k_{loi}^S$                 | Translocation rate constant of the non-ionisable solute towards the inner leaflet                                                                                          |
| $k_{loi}^{SH}$              | Translocation rate constant of the weak acid towards the inner leaflet                                                                                                     |
| $K_P$                       | Partition coefficient of the non-ionisable solute between the aqueous media and the membrane                                                                               |
| $K_P^{SD}$                  | Partition coefficient of the conjugated base between the aqueous media and the membrane                                                                                    |
| $K_P^{SH}$                  | Partition coefficient of the weak acid between the aqueous media and the membrane                                                                                          |
| $N_{L \text{ per vesicle}}$ | Number of lipids <i>per vesicle</i>                                                                                                                                        |
| $N_{\text{vesicles}}$       | Total number of vesicles                                                                                                                                                   |
| $P_{app}$                   | $\beta \frac{nS_A(\infty)}{nS_D(0)} \frac{V_D}{A}$ (equation (4) of the main manuscript)                                                                                   |
| $P_{app}^r$                 | $\beta \frac{r}{3}$ (equation (6) of the main manuscript)                                                                                                                  |

|                |                                                                                                    |
|----------------|----------------------------------------------------------------------------------------------------|
| $P_{app}^{rV}$ | $\beta \frac{r}{3} \left( 1 - \frac{V_A}{V_T} \right)$ (equation (19) of the main manuscript)      |
| $P_{app}^w$    | $\beta \frac{nS_{wA}(\infty)}{nS_{wD}(0)} \frac{V_{wD}}{A}$ (equation (21) of the main manuscript) |
| $P_{app}^{w*}$ | $\beta \frac{nS_A(\infty)}{nS_{wD}(0)} \frac{V_{wD}}{A}$ (equation (24) of the main manuscript)    |
| $PD_{wi}$      | Base form of the fluorescent probe in the inner aqueous compartment                                |
| $PH_{wi}$      | Weak acid form of the fluorescent probe in the inner aqueous compartment                           |
| $P_{obs}$      | $k_{loi}^S K_P h \frac{1}{fV_{wD} + K_P fV_{ID}}$ (equation (27) of the main manuscript)           |
| $P_T$          | Concentration of the fluorescent probe inside the vesicles ( $nP_T/V_{wi}$ )                       |
| $r_i$          | Internal vesicle radius ( $r - h$ )                                                                |
| $r_{io}$       | Radius of the surface separating the two membrane leaflets ( $r - h/2$ )                           |
| $r_o$          | Outer vesicle radius                                                                               |
| $S_A$          | Solute in the acceptor compartment                                                                 |
| $S_D$          | Solute in the donor compartment                                                                    |
| $SD_{li}$      | Solute base form in the inner membrane leaflet                                                     |
| $SD_{lo}$      | Solute base form in the outer membrane leaflet                                                     |
| $SD_{wi}$      | Solute base form in the inner aqueous compartment                                                  |
| $SD_{wo}$      | Solute base form in the outer aqueous compartment                                                  |
| $SH_{ID}$      | Solute acid form in the vicinity of the barrier (donor membrane leaflet)                           |
| $SH_{li}$      | Solute acid form in the inner membrane leaflet                                                     |
| $SH_{lo}$      | Solute acid form in the outer membrane leaflet                                                     |

|                   |                                                                                                                     |
|-------------------|---------------------------------------------------------------------------------------------------------------------|
| $SH_{wi}$         | Solute acid form in the inner aqueous compartment                                                                   |
| $SH_{wo}$         | Solute acid form in the outer aqueous compartment                                                                   |
| $S_i$             | Aggregated variable of the internal solute species:<br>$(nSH_{wi} + nSH_{li} + nSD_{wi} + nSD_{li})/V_i$            |
| $S_{ID}$          | Non-ionisable solute in the donor membrane leaflet                                                                  |
| $S_{li}$          | Non-ionisable solute in the inner membrane leaflet                                                                  |
| $S_{lo}$          | Non-ionisable solute in the outer membrane leaflet                                                                  |
| $S_o$             | Aggregated variable of the outer solute species:<br>$(nSH_{wo} + nSH_{lo} + nSD_{wo} + nSD_{lo})/(V_{wo} + V_{lo})$ |
| $S_T$             | Total concentration of the solute $(nS_T/V_T)$                                                                      |
| $S_{wA}$          | Solute in the acceptor aqueous compartment                                                                          |
| $S_{wD}$          | Solute in the donor aqueous compartment                                                                             |
| $S_{wi}$          | Non-ionisable solute in the inner aqueous compartment                                                               |
| $S_{wo}$          | Non-ionisable solute in the outer aqueous compartment                                                               |
| $V_A$             | Total volume of the acceptor compartments                                                                           |
| $V_D$             | Total volume of the donor compartments                                                                              |
| $V_i$             | Total volume of the inner compartments $(V_{wi} + V_{li})$                                                          |
| $V_L$ per vesicle | Volume occupied by the lipid molecules in a vesicle                                                                 |
| $\overline{V_L}$  | Molar volume of the lipid                                                                                           |
| $V_{IA}$          | Volume of the membrane leaflets of the acceptor compartments                                                        |
| $V_{ID}$          | Volume of the membrane leaflets of the donor compartments                                                           |
| $V_{li}$          | Total volume of the inner leaflets of the vesicles                                                                  |

---

|          |                                                                 |
|----------|-----------------------------------------------------------------|
| $V_{lo}$ | Total volume of the outer leaflets of the vesicles              |
| $V_T$    | Total volume ( $V_{wo} + V_{lo} + V_{li} + V_{wi}$ )            |
| $V_{wA}$ | Volume of the acceptor aqueous compartments                     |
| $V_{wD}$ | Volume of the donor aqueous compartments                        |
| $V_{wi}$ | Total volume of the aqueous medium encapsulated by the vesicles |
| $V_{wo}$ | Volume of the aqueous compartment outside the vesicles          |

---

## S2 – Supplementary figures for non-ionisable solutes and weak acids

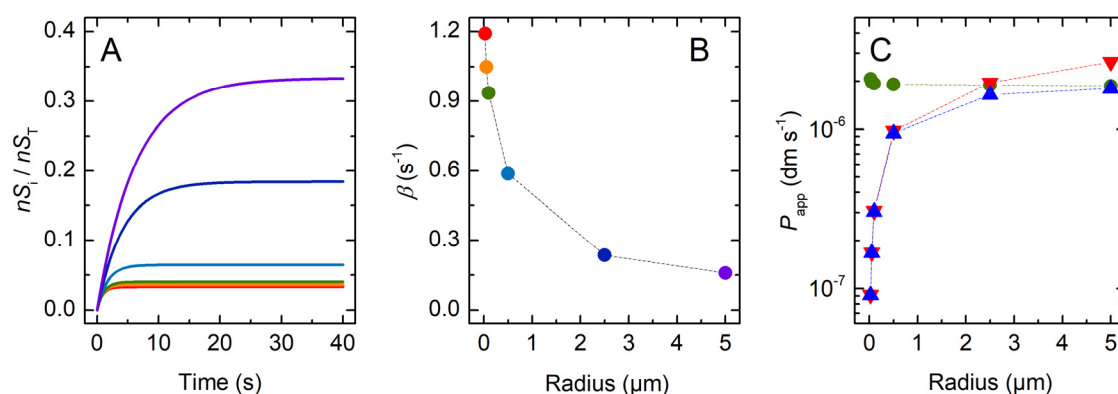

**Figure S1** – Permeation of moderately lipophilic non-ionisable solutes,  $K_P = 10^2$ . **(A)** Variation of the fraction of solute molecules inside the vesicles (membrane inner leaflet *plus* aqueous media) with 25 nm (—), 50 nm (—), 0.1  $\mu\text{m}$  (—), 0.5  $\mu\text{m}$  (—), 2.5  $\mu\text{m}$  (—) and 5  $\mu\text{m}$  radius (—). **(B)** Effect of the vesicle radius on the characteristic constant of solute equilibration. **(C)** Apparent permeability coefficient calculated from the general equation ( $P_{\text{app}}$  ●), and from the simplified equation ( $P_{\text{app}}^{\text{rV}}$  ▼ and  $P_{\text{app}}^{\text{rV}}$  ▲). Note the logarithmic scale of the y axis. The dotted lines in plots B and C are guides for the eye.

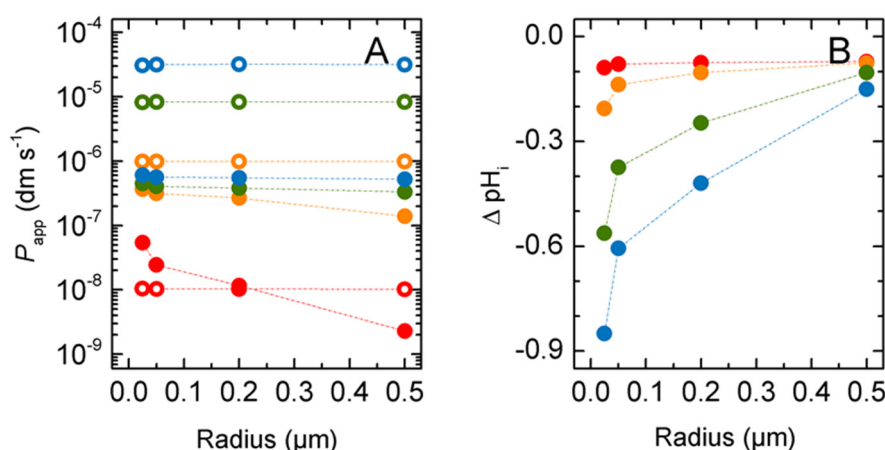

**Figure S2** – Dependence of the calculated permeability coefficient **(A)** and observed pH gradient at equilibrium **(B)** on the outer radius of the vesicles, for weak acids with different lipophilicity ( $K_P^{\text{SH}} = 1$  (●),  $10^1$  (●),  $10^3$  (●) and  $10^4$  (●)). The filled symbols in plot A correspond to  $P_{\text{app}}^{\text{r}}$  and the hollow symbols to  $P_{\text{app}}$ . The dotted lines are guides for the eye.

### S3 – Model for the permeation of weak bases

Figure S3 shows the reaction scheme for the permeation of weak bases. It is considered that

- the solute acid species are positively charged, and the solute base species have no charges;
- only the uncharged (*i.e.*, deprotonated,  $SD$ ) species permeate.  $k_{loi}^{SD}$  and  $k_{lio}^{SD}$  are the translocation rate constants of the weak base towards the inner and outer leaflets, respectively;
- protonation and deprotonation steps and partition processes are at quasi-equilibrium. The solute ionisation equilibria are now defined in terms of the acidity constant of the conjugated acid;
- the translocation of the weak base is the single rate-limiting step.

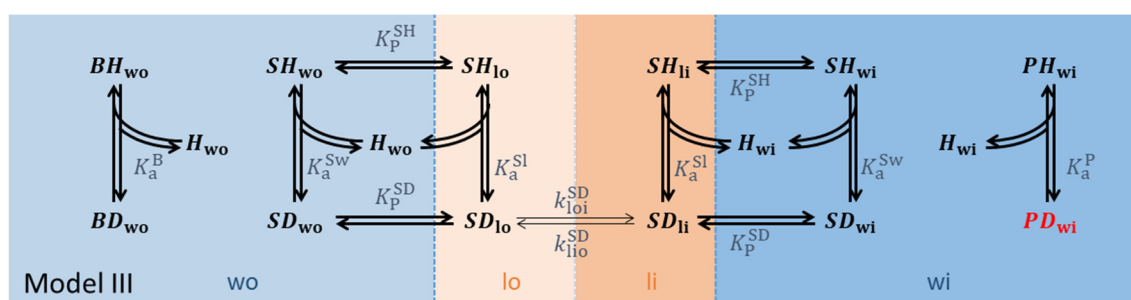

**Figure S3** – Reaction scheme for the permeation of a weak base (Model III). The translocation between the membrane leaflets is the single rate-limiting step (thin arrows), with protonation/deprotonation and aqueous/membrane partition processes being at quasi-equilibrium (thick arrows).

For the permeation of a weak base, the differential equation of the aggregated variable  $S_i$  is related to the local concentrations of  $SD_{lo}$  and  $SD_{li}$  as

$$\frac{dS_i(t)}{dt} = -k_{lio}^{SD} SD_{li}(t) \frac{V_{li}}{V_i} + k_{loi}^{SD} SD_{lo}(t) \frac{V_{lo}}{V_i}. \quad (S1)$$

As for the permeation of weak acids, the aggregated variable  $S_i$  is related to the local concentrations of the solute as

$$S_i(t) = [SH_{wi}(t) + SD_{wi}(t)] \frac{V_{wi}}{V_i} + [SH_{li}(t) + SD_{li}(t)] \frac{V_{li}}{V_i}. \quad (S2)$$

The quasi-equilibrium approximation for the partition into and from the membrane yields the relationships

$$K_P^{SH} = \frac{SH_{lo}(t)}{SH_{wo}(t)} = \frac{SH_{li}(t)}{SH_{wi}(t)}; \quad K_P^{SD} = \frac{SD_{lo}(t)}{SD_{wo}(t)} = \frac{SD_{li}(t)}{SD_{wi}(t)}, \quad (S3)$$

and for the ionisation of solute, base and probe translates into the relationships



$$\begin{aligned}
K_a^{Sw} &= \frac{SD_{wo}(t) H_{wo}(t)}{SH_{wo}(t)} = \frac{SD_{wi}(t) H_{wi}(t)}{SH_{wi}(t)} ; \\
K_a^{Sl} &= \frac{SD_{lo}(t) H_{wo}(t)}{SH_{lo}(t)} = \frac{SD_{li}(t) H_{wi}(t)}{SH_{li}(t)} ; \\
K_a^B &= \frac{BD_{wo}(t) H_{wo}(t)}{BH_{wo}(t)} ; \quad K_a^P = \frac{PD_{wi}(t) H_{wi}(t)}{BH_{wi}(t)} .
\end{aligned} \tag{S4}$$

The mass conservation relationships of solute, protons, buffer, and probe are given by:

$$\begin{aligned}
[SH_{wo}(t) + SD_{wo}(t)]fV_{wo} + [SH_{lo}(t) + SD_{lo}(t)]fV_{lo} + S_i(t)fV_i &= S_T \\
[SH_{wo}(t) + H_{wo}(t) + BH_{wo}(t)]fV_{wo} + SH_{lo}(t)fV_{lo} + [SH_{wi}(t) + H_{wi}(t) + PH_{wi}(t)]fV_{wi} + \\
+ SH_{li}(t)fV_{li} &= H_T
\end{aligned} \tag{S5}$$

$$BH_{wo}(t) + BD_{wo}(t) = B_T$$

$$PH_{wi}(t) + PD_{wi}(t) = P_T.$$

Solving the system of equations that includes equations (S3), (S4) and (S5) for the concentration of the species in the outer compartments, as function of the variables  $S_i$  and  $H_{wo}$  yields the analytical solution:

$$\begin{aligned}
SH_{wo}(t) &= \frac{H_{wo}(t)[S_T V_T - S_i(t) V_i]}{K_a^{Sw} (K_{wo}^{SD} V_{lo} + V_{wo}) + H_{wo}(t) (K_{wo}^{SH} V_{lo} + V_{wo})} \\
SD_{wo}(t) &= \frac{K_a^{Sw} [S_T V_T - S_i(t) V_i]}{K_a^{Sw} (K_P^{SD} V_{lo} + V_{wo}) + H_{wo}(t) (K_P^{SH} V_{lo} + V_{wo})} \\
SH_{lo}(t) &= \frac{H_{wo}(t) K_P^{SH} [S_T V_T - S_i(t) V_i]}{K_a^{Sw} (K_P^{SD} V_{lo} + V_{wo}) + H_{wo}(t) (K_P^{SH} V_{lo} + V_{wo})} \\
SD_{lo}(t) &= \frac{K_a^{Sw} K_P^{SH} [S_T V_T - S_i(t) V_i]}{K_a^{Sw} (K_P^{SD} V_{lo} + V_{wo}) + H_{wo}(t) (K_P^{SH} V_{lo} + V_{wo})} \\
BH_{wo}(t) &= \frac{B_T H_{wo}(t)}{K_a^B + H_{wo}(t)} ; \quad BD_{wo}(t) = \frac{B_T K_a^B}{K_a^B + H_{wo}(t)} .
\end{aligned} \tag{S6}$$

The overall system of equations lacks a simple closed-form analytical solution and must be solved numerically. This is done considering the partition and ionisation equilibria relationships for the inner solute species and probe, the mass conservations of the solute and the probe. All the required equations for the numerical integration procedure are listed above.
